298 **Occupational differences in the prevalence and severity of long-COVID: Analysis of the ONS**  
299 **Coronavirus (COVID-19) Infection Survey**

300 Theocharis Kromydas\*<sup>1</sup>, Evangelia Demou\*<sup>1</sup>, Rhiannon Edge<sup>2</sup>, Matthew Gittins<sup>3</sup>, S Vittal Katikireddi<sup>1</sup>,  
301 Neil Pearce<sup>4,5</sup>, Martie van Tongeren<sup>6,7</sup>, Jack Wilkinson<sup>3</sup>, Sarah Rhodes<sup>3</sup> (\*joint first authors)

- 302 1. MRC/CSO Social and Public Health Sciences Unit, University of Glasgow, Glasgow, UK  
303 2. Lancaster Medical School, University of Lancaster, Lancaster, UK  
304 3. Centre for Biostatistics, University of Manchester, UK  
305 4. Faculty of Public Health, Environment and Society, LSHTM, London, UK  
306 5. Department of Medical Statistics, LSHTM, London, UK  
307 6. Centre for Occupational and Environmental Health, University of Manchester, UK  
308 7. Thomas Ashton Institute for Risk and Regulatory Research, University of Manchester,  
309 Manchester, UK

310

311 Corresponding author: Dr Theocharis Kromydas, MRC/CSO Social and Public Health Sciences Unit,  
312 University of Glasgow, Email: [Theocharis.Kromydas@glasgow.ac.uk](mailto:Theocharis.Kromydas@glasgow.ac.uk)

313

314 **Abstract**

315 **Objectives:** To establish whether prevalence and severity of long-COVID symptoms vary by industry  
316 and occupation.

317 **Methods:** We utilised ONS Coronavirus Infection Survey (CIS) data (February 2021-April 2022) of  
318 working-age participants (16-65 years). Exposures were industrial sector, occupation and major  
319 Standard Occupational Classification (SOC) group. Outcomes were self-reported: (1) long-COVID  
320 symptoms; and (2) reduced function due to long-COVID. Binary (outcome 1) and ordered (outcome  
321 2) logistic regression were used to estimate odds ratios (OR) and prevalence (marginal means) for all  
322 exposures.

323 **Results:** Public facing industries, including teaching and education, social care, healthcare, civil  
324 service, retail and transport industries and occupations had highest odds ratios for long-COVID. By  
325 major SOC group, those in caring, leisure and other services (OR 1.44, CIs: 1.38-1.52) had  
326 substantially elevated odds than average. For almost all exposures, the pattern of odds ratios for  
327 long-COVID symptoms followed that for SARS-CoV-2 infections, except for professional occupations  
328 (OR<1 for infection; OR>1 for long-COVID). The probability of reporting long-COVID for industry  
329 ranged from 7.7% (financial services) to 11.6% (teaching and education); whereas the prevalence of  
330 reduced function by 'a lot' ranged from 17.1% (arts, entertainment and recreation) to 22-23%  
331 (teaching and education and armed forces ) and to 27% (those not working).

332 **Conclusions:** The risk and prevalence of long-COVID differs across industries and occupations.  
333 Generally, it appears that likelihood of developing long-COVID symptoms follows likelihood of SARS-  
334 CoV-2 infection, except for professional occupations. These findings highlight sectors and  
335 occupations where further research is needed to understand the occupational factors resulting in  
336 long-COVID.

337

338 **Key messages**

339 **What is already known on this topic –**

- 340       • SARS-CoV-2 infection and COVID-19 mortality in the UK varied by occupational group; yet it  
341       is not known if any occupational groups are more susceptible to long-COVID than others.

342 **What this study adds –**

- 343       • This is the first study to examine how prevalence of long-COVID and its impacts on functional  
344       capacity differ by industrial sector and occupational groups.
- 345       • Prevalence of self-reported long-COVID increased with time across all exposure groups and  
346       mostly followed SARS-CoV-2 infection trends; with the exception of Professional occupations  
347       that demonstrated notable differences in the direction of odds of long-covid when  
348       compared to odds of SARS-CoV-2 infection.
- 349       • Those working in Teaching and education, and social care industries showed the highest  
350       likelihood of having long-COVID symptoms. The exact same pattern was observed when  
351       analysis was performed using occupational groups. When we used SOC groups the likelihood  
352       was higher in Caring, leisure and other services.

353 **How this study might affect research, practice or policy –**

- 354       • The findings contribute to the evidence base that long-COVID differences occur across  
355       industries and occupations, provides insights for employees, employers, occupational and  
356       healthcare for the industries and occupations that may need additional support for return-  
357       to-work policies and highlights sectors and occupations where further research is needed to  
358       understand the mechanisms resulting in long-COVID and how occupational factors influence  
359       the risk of developing long-COVID or interact with long-COVID to increase the impact on  
360       activities.

361

362

363

364

365

366

## 367 Introduction

368 In the UK, the risk of SARS-CoV-2 infection and COVID-19 mortality has varied by occupational group,  
369 although most differences appear to have declined over the duration of the pandemic (1-5). It  
370 remains unclear however, whether or not some occupational groups are more susceptible to long-;  
371 and if any differences reflect, or are addition to, differential risks in SARS-CoV-2 infection (6). The  
372 highest risks of long-COVID are reported amongst workers in education, social care and healthcare  
373 sectors (7); all sectors with elevated risks of SARS-CoV-2 infection during the pandemic (8).

374 Being out of work is associated with poor health (9-11) and the risk unemployment increases with  
375 length of sick leave (12). Recent studies have demonstrated the burden of long-COVID, where even  
376 after months, many patients report persisting symptoms and have not returned to previous levels of  
377 work (13 14). A Danish nationwide registry study demonstrated that of those hospitalised, being  
378 female, older age, and having a comorbidity were associated with a lower chance of returning to  
379 work (15). Davies *et al*, showed that almost half of the study respondents suffering with long-COVID  
380 required a reduced work schedule compared to pre-illness (13). A Swedish national cohort study  
381 showed that 13% were on sick leave due to long-COVID from March-August 2020 and 9% were on  
382 sick leave for at least four months (16). Those on sick leave due to long-COVID were older,  
383 predominantly men, spent more time on sick leave prior to COVID-19, and were more likely to have  
384 received inpatient care (16). While we understand some of the factors that predict long-COVID and  
385 work ability, little is known about how the prevalence of long-COVID and associated functional  
386 capacity differs by occupation and the impact of occupational factors on these patterns.

387 Long-COVID has a disproportionate impact on groups already disadvantaged in terms of work and  
388 health. Returning to work is part of rehabilitation from illness and is important to those recovering  
389 from long-COVID (12). Many people with significant illness or disability work effectively if they are  
390 provided with suitable support in the workplace (12). Better understanding of the prevalence and  
391 severity of long-COVID in different occupational groups will inform the need for rehabilitation,  
392 workplace adjustment measures and support (17) and provide evidence about whether or not long-  
393 COVID should be considered an occupational disease (7). It may also identify workplaces that need  
394 additional support measures to reduce risks of transitioning to long-COVID after SARS-CoV-2  
395 infection.

396

397 Our study aims to establish whether the prevalence and severity of long-COVID varied by occupation  
398 and if any differences are in excess of differences in the risk of SARS-CoV-2 infection.

399

## 400 **METHODS AND DATA**

### 401 **Study design**

402 We used data from the ONS Coronavirus (COVID-19) Infection Survey (CIS) from Feb 2021 (when  
403 long-Covid questions were first included in CIS) until the end of April 2022. This longitudinal study  
404 began in April 2020, used random sampling and aimed to be representative of the UK population.  
405 Repeated PCR testing for all participants was carried out during weekly home visits for the first  
406 month of entry to the survey, and then monthly until 30<sup>th</sup> April 2022 when testing samples were sent  
407 and returned by post and survey questions were asked on-line or over the phone (18). CIS uses 4  
408 different variables to capture employment status. Participants were coded as employed or not  
409 working (Employment status coding section).

410 Analyses were restricted to participants aged  $\geq 16$  to  $\leq 65$  years old on the day of their first home visit  
411 and to those who turned 16 during the study period and had answered long-COVID questions at  
412 least once.

413 We used the first available observation per occupational exposure and other covariates, assuming  
414 no change across time. In sensitivity analyses, we estimated panel models to allow for variation  
415 across time.

416

### 417 **Exposure groups**

418 We used three different industry and occupational groupings. Industry was classified based on the  
419 ONS sector groupings used within CIS (19). Based on expert judgement and consensus among team  
420 members we derived a bespoke set of occupational groupings using 4-digit standard occupational  
421 codes (SOC 2010) (Table S1) (20). Groups used in previous studies (2-4 21) focussed on key  
422 worker/essential worker groups (i.e., those with highest exposure at the start of the pandemic) and  
423 therefore new groupings were needed to capture all occupations and exposures while ensuring  
424 adequate group size, as the pandemic progressed. The third exposure category was by major SOC  
425 group.

426

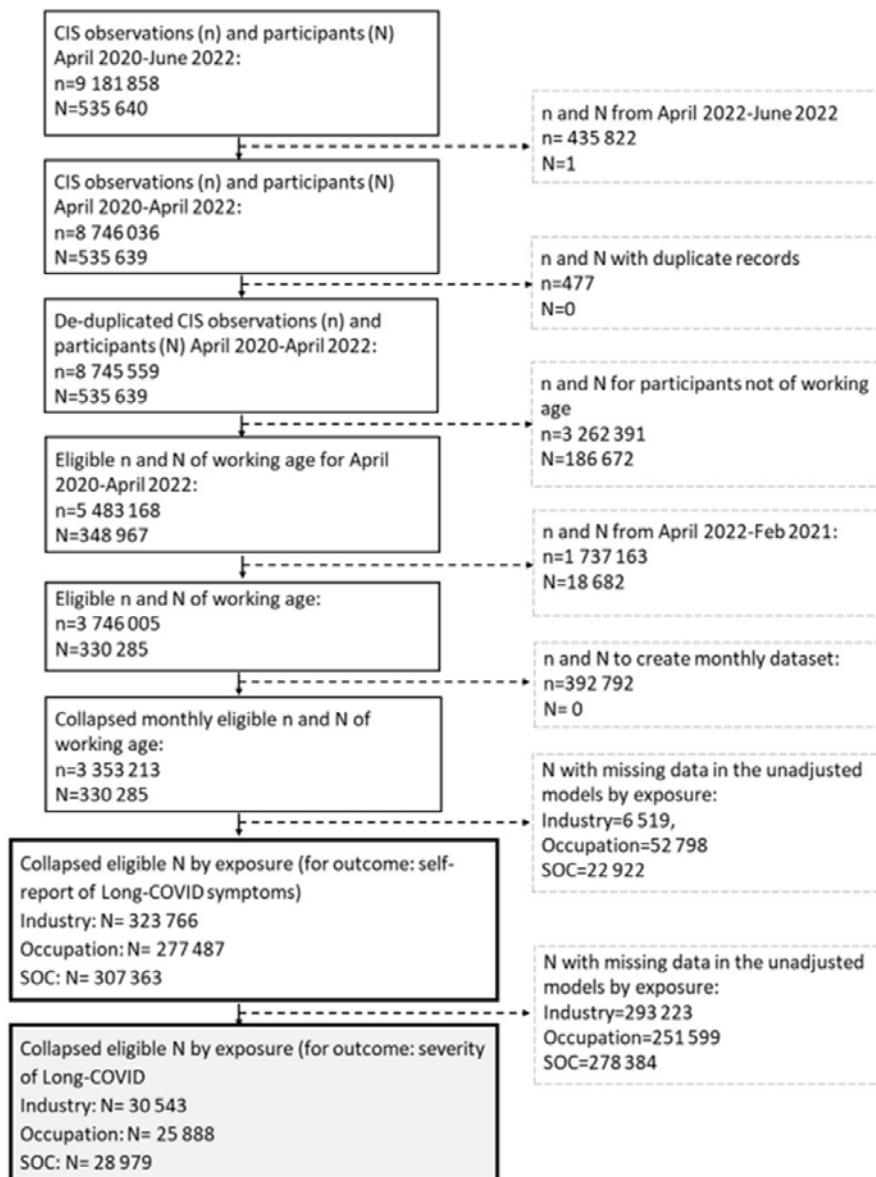

427

428 **Figure 1.** Flow chart of Covid Infection Survey (CIS) participants. N= number of participants,  
429 n=number of observations

430

431

432 **Analytical sample and ascertainment of outcome**

433 Primary outcome measures were self-reported (i) cases of long-COVID and (ii) reduced function (i.e.,  
434 severity) due to long-COVID among those reporting long-COVID, using the following CIS questions:

- 435 (i) self-reported long-COVID: *“Would you describe yourself as having 'long-COVID', that is, you*  
436 *are still experiencing symptoms more than 4 weeks after you first had COVID-19, that are not*  
437 *explained by something else?”*. For our primary analysis we reported the n (%) of people who  
438 self-reported having long-COVID in at least one survey, irrespective of any COVID-19 test  
439 result or previous infection reported.
- 440 (ii) self-reported reduced function (severity) of long-COVID: *‘How much did long-COVID reduce*  
441 *your ability to carry out daily activities?’* Respondents could answer 0: not at all, 1: Yes, a little,  
442 2: Yes, a lot. This analytical sample was restricted to those self-reporting long-covid  
443 symptoms.

444

#### 445 **Statistical analyses**

446 Analysis was completed for the two outcome variables using all three exposure groups, irrespective  
447 of whether they have tested or reported being previously infected by SARS-CoV-2. For comparison,  
448 we also performed analyses using the outcome ‘SARS-CoV-2 infection (self-reported or positive PCR  
449 test).

450 Sample characteristics were summarised using frequencies and proportions. Descriptive statistics  
451 were used to show the change in prevalence of self-reported long-COVID over time. Binary (outcome  
452 1: long-COVID symptoms) and ordered (outcome 2: reduced function due to long-COVID) logistic  
453 regression models with robust standard errors to account for heteroskedasticity were used. For the  
454 binary logistic regression analyses, data were collapsed by person using the first reported values for  
455 exposure and covariates and taking ‘at least one reported episode of long-COVID’ as the outcome.  
456 For the ordered logistic regression, the highest reported value for the outcome variable (i.e., severity  
457 of long-COVID) was used per person. We used effects coding where ORs are contrasted to each  
458 group mean compared to the grand mean showing the likelihood of having long-COVID in each  
459 group. To assess for potential confounding or mediating differences we estimated unadjusted and  
460 fully adjusted models for all the covariates (age, sex, IMD, rural or urban location, household size,  
461 region, pre-existing health conditions) (2).

462 Weighting was not used as the CIS derived weights are cross sectional. Testing for patterns of  
463 missingness in the outcome variable did not show any differences (Table S2). Participants with no  
464 measures in our outcome, exposure and covariate variables were excluded (Figure 1; Table S2). We  
465 included the non-working group for comparison purposes.

466

## 467 Sensitivity Analyses

468 Sensitivity analyses based on our main analytical methods was conducted using two additional  
469 analytical samples: (i) those with a positive PCR test; and (ii) those with a positive PCR test and/or  
470 self-reported infection before entering the CIS. Furthermore, using the specifications of our main  
471 sample, multiple participant visits and records were merged where needed to create a dataset with  
472 one observation per month per person to allow variation across time (Figure 1). We used multilevel  
473 mixed-methods generalised linear models, with a binomial link function for the outcome of having  
474 long-COVID symptoms; and a multilevel mixed-effects ordered logistic regression for the outcome of  
475 reduced function due to long-COVID and compare with the estimations of our analytical model.

476 All analyses were calculated using STATA 17 (22).

477

## 478 **RESULTS**

### 479 **Cohort characteristics**

480 Our final analytical samples included 323 766 individuals by industry, 277 487 individuals by  
481 occupational group and 307 363 individuals by major SOC group (Figure 1). Table 1 illustrates  
482 descriptive statistics by exposure group. In all cases, the non-working group had approximately twice  
483 as high prevalence of underlying health conditions (Table S3) and a higher prevalence of being  
484 affected ‘a lot’ by long-COVID. (Tables S4b, S5b, S6b) compared to the working group.

485 Monthly prevalence of self-reported long-COVID and SARS-CoV-2 infection across time and across all  
486 three occupational exposures, demonstrates an increase of the prevalence of self-reported long-  
487 COVID with time, following similar trends in SARS-CoV-2 infection (Figure 2). Prevalence of long-  
488 COVID by industry ranges from ~2% to almost 6% in April 2022 for social care and education. The  
489 healthcare sector also shows relatively high prevalence that increases post-January 2022. Similar  
490 patterns in long-COVID prevalence are observed by occupation and major SOC group. Education and  
491 social care and hospitality occupations demonstrate the highest prevalence (>4% from Jan 2022).  
492 Caring, leisure and other service occupations (SOC group) exhibit the highest prevalence, followed  
493 by sales and customer service occupations.

494

Table 1. Descriptive statistics of all covariates used for adjustment by exposure and self-reported long-covid case- Number and percentages of individuals

| Exposure groups           |                          | Industry (SIC) |               |                |             |            |              | Occupational groups |               |                |             |            |              | Major occupational groups (SOC) |               |                |             |            |              |
|---------------------------|--------------------------|----------------|---------------|----------------|-------------|------------|--------------|---------------------|---------------|----------------|-------------|------------|--------------|---------------------------------|---------------|----------------|-------------|------------|--------------|
| Outcome                   | Self-reported long-COVID | Count          |               | Total          | %           |            | Total        | Count               |               | Total          | %           |            | Total        | Count                           |               | %              |             | Total      |              |
|                           |                          | No             | Yes           |                | No          | Yes        |              | No                  | Yes           |                | No          | Yes        |              | No                              | Yes           |                |             |            |              |
| Age bands                 | 15-19                    | 21 083         | 1 440         | 22 523         | 7.2         | 4.7        | 7.0          | 20 771              | 1 415         | 22 186         | 8.3         | 5.5        | 8.0          | 20 911                          | 1 430         | 22 341         | 7.5         | 4.9        | 7.3          |
|                           | 20-24                    | 15 820         | 1 140         | 16 960         | 5.4         | 3.7        | 5.2          | 14 149              | 998           | 15 147         | 5.6         | 3.9        | 5.5          | 15 193                          | 1 089         | 16 282         | 5.5         | 3.8        | 5.3          |
|                           | 25-29                    | 20 191         | 1 516         | 21 707         | 6.9         | 5.0        | 6.7          | 16 607              | 1 234         | 17 841         | 6.6         | 4.8        | 6.4          | 18 864                          | 1 432         | 20 296         | 6.8         | 4.9        | 6.6          |
|                           | 30-34                    | 24 958         | 2 168         | 27 126         | 8.5         | 7.1        | 8.4          | 20 492              | 1 780         | 22 272         | 8.1         | 6.9        | 8.0          | 23 390                          | 2 045         | 25 435         | 8.4         | 7.1        | 8.3          |
|                           | 35-39                    | 27 647         | 2 911         | 30 558         | 9.4         | 9.5        | 9.4          | 22 596              | 2 348         | 24 944         | 9.0         | 9.1        | 9.0          | 25 890                          | 2 715         | 28 605         | 9.3         | 9.4        | 9.3          |
|                           | 40-44                    | 29 224         | 3 766         | 32 990         | 10.0        | 12.3       | 10.2         | 23 787              | 3 065         | 26 852         | 9.5         | 11.8       | 9.7          | 27 315                          | 3 520         | 30 835         | 9.8         | 12.2       | 10.0         |
|                           | 45-49                    | 30 989         | 4 032         | 35 021         | 10.6        | 13.2       | 10.8         | 25 318              | 3 323         | 28 641         | 10.1        | 12.8       | 10.3         | 28 983                          | 3 807         | 32 790         | 10.4        | 13.1       | 10.7         |
|                           | 50-54                    | 34 809         | 4 550         | 39 359         | 11.9        | 14.9       | 12.2         | 28 866              | 3 752         | 32 618         | 11.5        | 14.5       | 11.8         | 32 671                          | 4 270         | 36 941         | 11.7        | 14.7       | 12.0         |
|                           | 55-59                    | 38 180         | 4 353         | 42 533         | 13.0        | 14.3       | 13.1         | 32 773              | 3 744         | 36 517         | 13.0        | 14.5       | 13.2         | 36 252                          | 4 146         | 40 398         | 13.0        | 14.3       | 13.1         |
|                           | 60-64                    | 39 819         | 3 819         | 43 638         | 13.6        | 12.5       | 13.5         | 36 261              | 3 435         | 39 696         | 14.4        | 13.3       | 14.3         | 38 585                          | 3 694         | 42 279         | 13.9        | 12.8       | 13.8         |
| 65-69                     | 10 503                   | 848            | 11 351        | 3.6            | 2.8         | 3.5        | 9 979        | 794                 | 10 773        | 4.0            | 3.1         | 3.9        | 10 329       | 832                             | 11 161        | 3.7            | 2.9         | 3.6        |              |
| Sex                       | Male                     | 135 306        | 11 759        | 147 065        | 46.1        | 38.5       | 45.4         | 114 942             | 9 826         | 124 768        | 45.7        | 38.0       | 45.0         | 127 779                         | 11 075        | 138 854        | 45.9        | 38.2       | 45.2         |
|                           | Female                   | 157 917        | 18 784        | 176 701        | 53.9        | 61.5       | 54.6         | 136 657             | 16 062        | 152 719        | 54.3        | 62.0       | 55.0         | 150 604                         | 17 905        | 168 509        | 54.1        | 61.8       | 54.8         |
| Deprivation               | 1st Quartile             | 44 738         | 5 668         | 50 406         | 15.3        | 18.6       | 15.6         | 39 010              | 4 908         | 43 918         | 15.5        | 19.0       | 15.8         | 42 574                          | 5 393         | 47 967         | 15.3        | 18.6       | 15.6         |
|                           | 2nd Quartile             | 68 677         | 7 360         | 76 037         | 23.4        | 24.1       | 23.5         | 58 714              | 6 292         | 65 006         | 23.3        | 24.3       | 23.4         | 65 160                          | 7 007         | 72 167         | 23.4        | 24.2       | 23.5         |
|                           | 3rd Quartile             | 83 677         | 8 398         | 92 075         | 28.5        | 27.5       | 28.4         | 71 560              | 7 095         | 78 655         | 28.4        | 27.4       | 28.4         | 79 472                          | 7 958         | 87 430         | 28.6        | 27.5       | 28.5         |
|                           | 4th Quartile             | 96 131         | 9 117         | 105 248        | 32.8        | 29.9       | 32.5         | 82 315              | 7 593         | 89 908         | 32.7        | 29.3       | 32.4         | 91 177                          | 8 622         | 99 799         | 32.8        | 29.8       | 32.5         |
| Government office regions | North East               | 10 033         | 1 349         | 11 382         | 3.4         | 4.4        | 3.5          | 8 563               | 1 124         | 9 687          | 3.4         | 4.3        | 3.5          | 9 540                           | 1 279         | 10 819         | 3.4         | 4.4        | 3.5          |
|                           | North West               | 32 049         | 3 914         | 35 963         | 10.9        | 12.8       | 11.1         | 27 026              | 3 241         | 30 267         | 10.7        | 12.5       | 10.9         | 30 258                          | 3 678         | 33 936         | 10.9        | 12.7       | 11.0         |
|                           | Yorkshire & the Humber   | 23 074         | 2 692         | 25 766         | 7.9         | 8.8        | 8.0          | 19 772              | 2 264         | 22 036         | 7.9         | 8.8        | 7.9          | 21 969                          | 2 571         | 24 540         | 7.9         | 8.9        | 8.0          |
|                           | East Midlands            | 18 474         | 2 032         | 20 506         | 6.3         | 6.7        | 6.3          | 15 832              | 1 728         | 17 560         | 6.3         | 6.7        | 6.3          | 17 544                          | 1 938         | 19 482         | 6.3         | 6.7        | 6.3          |
|                           | West Midlands            | 21 127         | 2 430         | 23 557         | 7.2         | 8.0        | 7.3          | 18 163              | 2 033         | 20 196         | 7.2         | 7.9        | 7.3          | 20 160                          | 2 320         | 22 480         | 7.2         | 8.0        | 7.3          |
|                           | East of England          | 26 605         | 2 704         | 29 309         | 9.1         | 8.9        | 9.1          | 22 254              | 2 230         | 24 484         | 8.9         | 8.6        | 8.8          | 25 298                          | 2 577         | 27 875         | 9.1         | 8.9        | 9.1          |
|                           | London                   | 56 565         | 5 190         | 61 755         | 19.3        | 17.0       | 19.1         | 46 784              | 4 276         | 51 060         | 18.6        | 16.5       | 18.4         | 52 959                          | 4 886         | 57 845         | 19.0        | 16.9       | 18.8         |
|                           | South East               | 36 248         | 3 477         | 39 725         | 12.4        | 11.4       | 12.3         | 31 041              | 2 919         | 33 960         | 12.3        | 11.3       | 12.2         | 34 384                          | 3 282         | 37 666         | 12.4        | 11.3       | 12.3         |
|                           | South West               | 22 150         | 2 147         | 24 297         | 7.6         | 7.0        | 7.5          | 19 331              | 1 861         | 21 192         | 7.7         | 7.2        | 7.6          | 21 195                          | 2 021         | 23 216         | 7.6         | 7.0        | 7.6          |
|                           | Northern Ireland         | 8 378          | 838           | 9 216          | 2.9         | 2.7        | 2.9          | 7 431               | 738           | 8 169          | 3.0         | 2.9        | 2.9          | 7 851                           | 785           | 8 636          | 2.8         | 2.7        | 2.8          |
| Scotland                  | 24 138                   | 2 266          | 26 404        | 8.2            | 7.4         | 8.2        | 22 263       | 2 110               | 24 373        | 8.9            | 8.2         | 8.8        | 23 428       | 2 205                           | 25 633        | 8.4            | 7.6         | 8.3        |              |
| Wales                     | 14 382                   | 1 504          | 15 886        | 4.9            | 4.9         | 4.9        | 13 139       | 1 364               | 14 503        | 5.2            | 5.3         | 5.2        | 13 797       | 1 438                           | 15 235        | 5.0            | 5.0         | 5.0        |              |
| Urban or Rural            | Major urban              | 110 000        | 11 547        | 121 547        | 37.5        | 37.8       | 37.5         | 92 337              | 9 624         | 101 961        | 36.7        | 37.2       | 36.7         | 103 478                         | 10 918        | 114 396        | 37.2        | 37.7       | 37.2         |
|                           | Urban city or town       | 122 942        | 13 315        | 136 257        | 41.9        | 43.6       | 42.1         | 106 614             | 11 333        | 117 947        | 42.4        | 43.8       | 42.5         | 117 243                         | 12 617        | 129 860        | 42.1        | 43.5       | 42.3         |
|                           | Rural town               | 29 107         | 2 890         | 31 997         | 9.9         | 9.5        | 9.9          | 25 176              | 2 494         | 27 670         | 10.0        | 9.6        | 10.0         | 27 806                          | 2 790         | 30 596         | 10.0        | 9.6        | 10.0         |
|                           | Rural village            | 31 174         | 2 791         | 33 965         | 10.6        | 9.1        | 10.5         | 27 472              | 2 437         | 29 909         | 10.9        | 9.4        | 10.8         | 29 856                          | 2 655         | 32 511         | 10.7        | 9.2        | 10.6         |
| Household Size            | One                      | 38 251         | 4 202         | 42 453         | 13.1        | 13.8       | 13.1         | 32 671              | 3 562         | 36 233         | 13.0        | 13.8       | 13.1         | 36 288                          | 3 975         | 40 263         | 13.0        | 13.7       | 13.1         |
|                           | Two                      | 109 005        | 10 377        | 119 382        | 37.2        | 34.0       | 36.9         | 93 306              | 8 859         | 102 165        | 37.1        | 34.2       | 36.8         | 103 553                         | 9 881         | 113 434        | 37.2        | 34.1       | 36.9         |
|                           | Three                    | 59 258         | 6 298         | 65 556         | 20.2        | 20.6       | 20.3         | 50 670              | 5 290         | 55 960         | 20.1        | 20.4       | 20.2         | 56 126                          | 5 972         | 62 098         | 20.2        | 20.6       | 20.2         |
|                           | Four                     | 59 824         | 6 646         | 66 470         | 20.4        | 21.8       | 20.5         | 51 287              | 5 627         | 56 914         | 20.4        | 21.7       | 20.5         | 56 783                          | 6 303         | 63 086         | 20.4        | 21.8       | 20.5         |
|                           | Five plus                | 26 885         | 3 020         | 29 905         | 9.2         | 9.9        | 9.2          | 23 665              | 2 550         | 26 215         | 9.4         | 9.9        | 9.5          | 25 633                          | 2 849         | 28 482         | 9.2         | 9.8        | 9.3          |
| Health Condition          | No                       | 248 054        | 23 727        | 271 781        | 84.6        | 77.7       | 83.9         | 210 591             | 19 808        | 230 399        | 83.7        | 76.5       | 83.0         | 234 681                         | 22 422        | 257 103        | 84.3        | 77.4       | 83.7         |
|                           | Yes                      | 45 169         | 6 816         | 51 985         | 15.4        | 22.3       | 16.1         | 41 008              | 6 080         | 47 088         | 16.3        | 23.5       | 17.0         | 43 702                          | 6 558         | 50 260         | 15.7        | 22.6       | 16.4         |
| <b>Total</b>              |                          | <b>293 223</b> | <b>30 543</b> | <b>323 766</b> | <b>90.6</b> | <b>9.4</b> | <b>100.0</b> | <b>251 599</b>      | <b>25 888</b> | <b>277 487</b> | <b>90.7</b> | <b>9.3</b> | <b>100.0</b> | <b>278 383</b>                  | <b>28 980</b> | <b>307 363</b> | <b>90.6</b> | <b>9.4</b> | <b>100.0</b> |



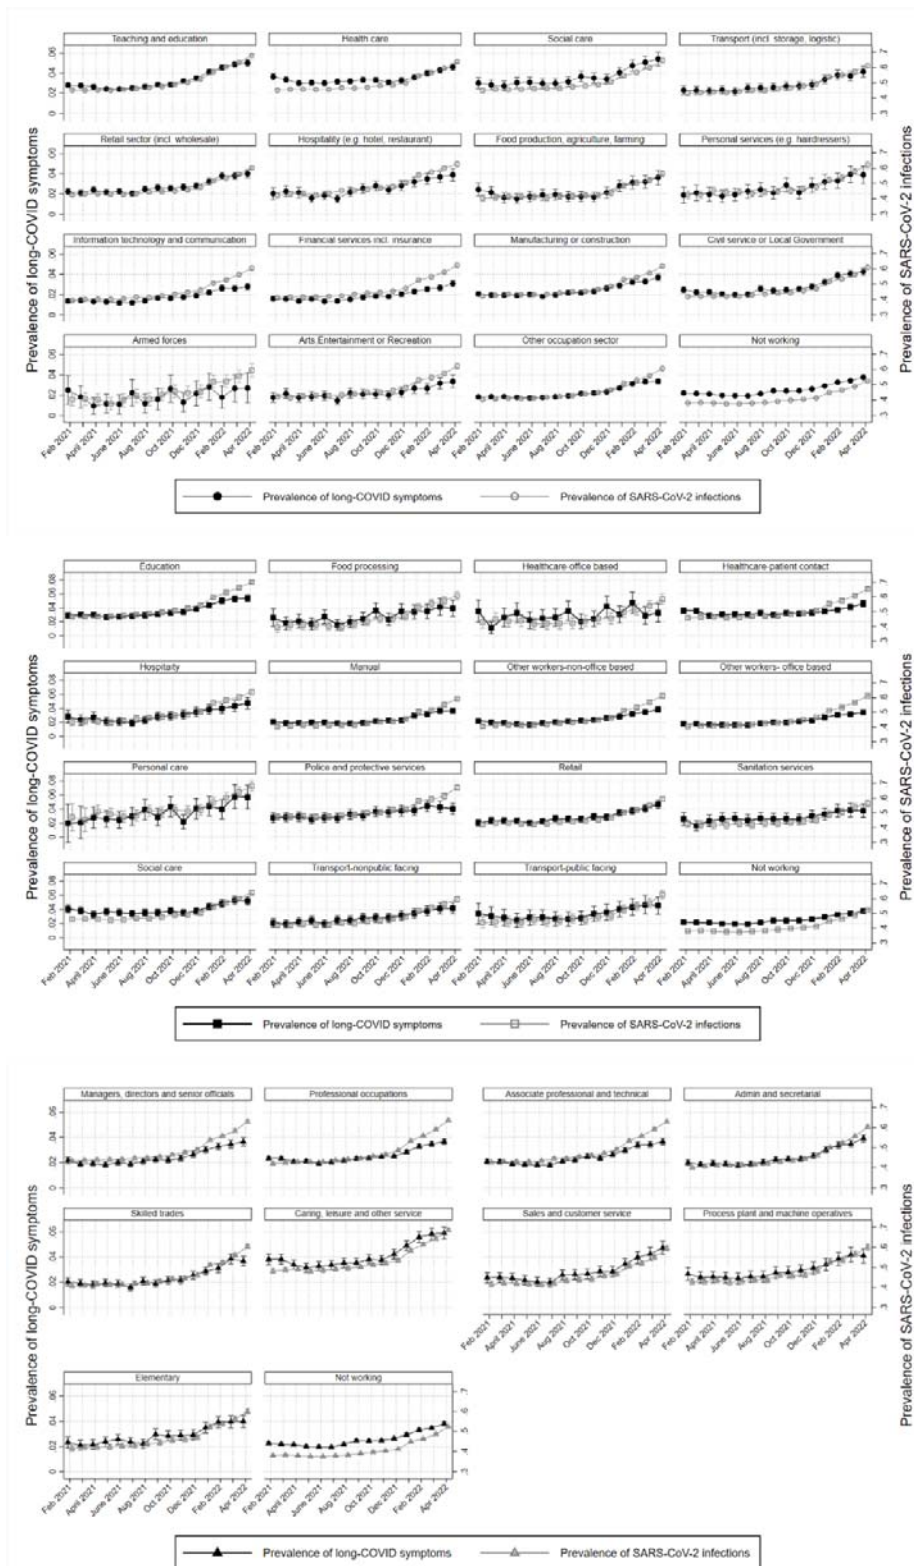

298

299 **Figure 2:** Monthly prevalence of self-reported long-COVID symptoms (Primary y-axis; left) and SARS-  
 300 CoV-2 infections (secondary y-axis; right) for all workers aged 16-65 for (a) industry; (b) occupational  
 301 groups; and (c) SOC major groups

302

303 **Relative risk (ORs) and prevalence (marginal means) of long-COVID**

304 In the unadjusted model (Table S7), Teaching and education (OR 1.41; CIs: 1.36-1.46), Social care (OR  
305 1.38, CIs: 1.28-1.48), Healthcare (1.19; CIs: 1.14-1.23), Civil service or local government (1.12; CIs:  
306 1.06-1.17), retail (1.08; CIs: 1.08; 1.03-1.14) and transport (1.08; CIs: 1.00-1.16) demonstrated  
307 increased likelihood of reporting long-COVID symptoms compared to the average working-age  
308 population. All other sectors (including the non-working group) showed odds ratios (ORs) less than  
309 one or with very wide CIs, with the lowest ORs being in the information technology and  
310 communication sector(IT) (0.75; CIs: 0.71-0.79). In the fully adjusted model (Table S7, Figure 3a), ORs  
311 for most industries were attenuated and the pattern remained the same with Teaching and  
312 education exhibiting the highest odds (1.27; CIs: 1.23-1.31). Exceptions to confounding attenuation  
313 were primarily seen for the transport industry (1.12; CIs: 1.04-1.21) and hospitality and  
314 manufacturing, albeit with wide confidence intervals. Prevalence of long-COVID (marginal means-  
315 predicted probability of having at least one episode of long-COVID symptoms across all groups)  
316 ranged from 7.8% (IT, financial services and armed forces) to 11.1% (social care) and 11.6% for  
317 teaching and education (Table S9, Figure S1a).

318 By occupational group, in the unadjusted model most demonstrated higher likelihood of having  
319 long-COVID; however, for some CIs are wide (Table S7). Similar to analysis by industry, education (OR  
320 1.53; CIs: 1.61-1.79) and Social Care (1.53; CIs: 1.45-1.60) occupations showed the highest risk.  
321 Manual, other workers-non-office based and office-based occupations, along with the non-working  
322 group showed ORs<1. After adjustment (Table S7, Figure 3b), education (1.34; CIs: 1.28-1.41) and  
323 social care (1.34; CIs: 1.26-1.43) remained the two groups with the highest relative risk and were  
324 closely followed by police and protective services (1.31; CIs 1.18-1.45), hospitality (1.27; CIs 1.13-  
325 1.43), and transport- public facing (1.25; CIs 1.03-1.51) or non-public facing (1.16; CIs 1.04-1.29). The  
326 group with the lowest ORs was office-based occupations (0.90; CIs: 0.88-0.92). All other groups with  
327 ORs≤1 have very wide confidence intervals. Prevalence of long-COVID by occupational group ranged  
328 from a low of 8.4% in other workers-office based, to a high of 12% in education (Table S9, Figure  
329 S1b).

330 Using major SOC group as the exposure, in the unadjusted model (Table S7), ORs for Caring, Leisure  
331 and other services stand out (OR 1.65, CIs: 1.58-1.73), compared to all other groups, followed by the  
332 sales and customers service, elementary, and process plant and machine operatives' groups with  
333 ORs>1. In the remaining major SOC groups ORs were lower than one. After adjustment the category  
334 with the highest ORs remains the same; however, ORs were slightly attenuated. Minor changes were

335 observed in all other groups (Table S7, Figure 3c). Admin and secretarial, professional occupations  
336 and those not working were less likely to report long-COVID symptoms. However, those in caring,  
337 leisure and other services (1.44, CIs: 1.38-1.53) still demonstrated substantially higher odds than  
338 average, followed by process plant and machine operatives (1.14, CIs: 1.05-1.23), sales and customer  
339 service (1.11, CIs: 1.04-1.19) and elementary occupations (1.11, CIs: 1.04-1.19). Finally, estimations  
340 for managers, directors and senior officials, and associate professional and technical occupations are  
341 uncertain. For most occupational groups prevalence of long-COVID was between 9 and 10%, with  
342 the exceptions of caring, leisure and other service occupations with 13% prevalence Analysis by  
343 major SOC group (Table S9, Figure S1c).

344 Comparing the likelihood of long-COVID with the likelihood of SARS-CoV-2 infection (Figures 3a-c)  
345 demonstrates similar patterns, i.e., industries with high risk of SARS-CoV-2 infection generally display  
346 high likelihood of long-COVID symptoms. In the majority of occupational groups similar patterns  
347 exist, with minor discrepancies for healthcare-office based where  $OR > 1$  for SARS-CoV-2 infection  
348 and  $OR < 1$  for long-COVID; and food processing and sanitation services where the opposite pattern is  
349 observed (Figure 3b). Using major SOC groups as the exposure displayed similar findings (Figure 3c),  
350 with the main exception of professional occupations, where likelihood of long-COVID is  
351 proportionally higher compared to SARS-CoV-2 infection. Some indication of different patterns  
352 between risk of infection and long-COVID were also observed in managers, directors and senior  
353 officials and sales occupations; however, in all cases confidence intervals are wide.

354

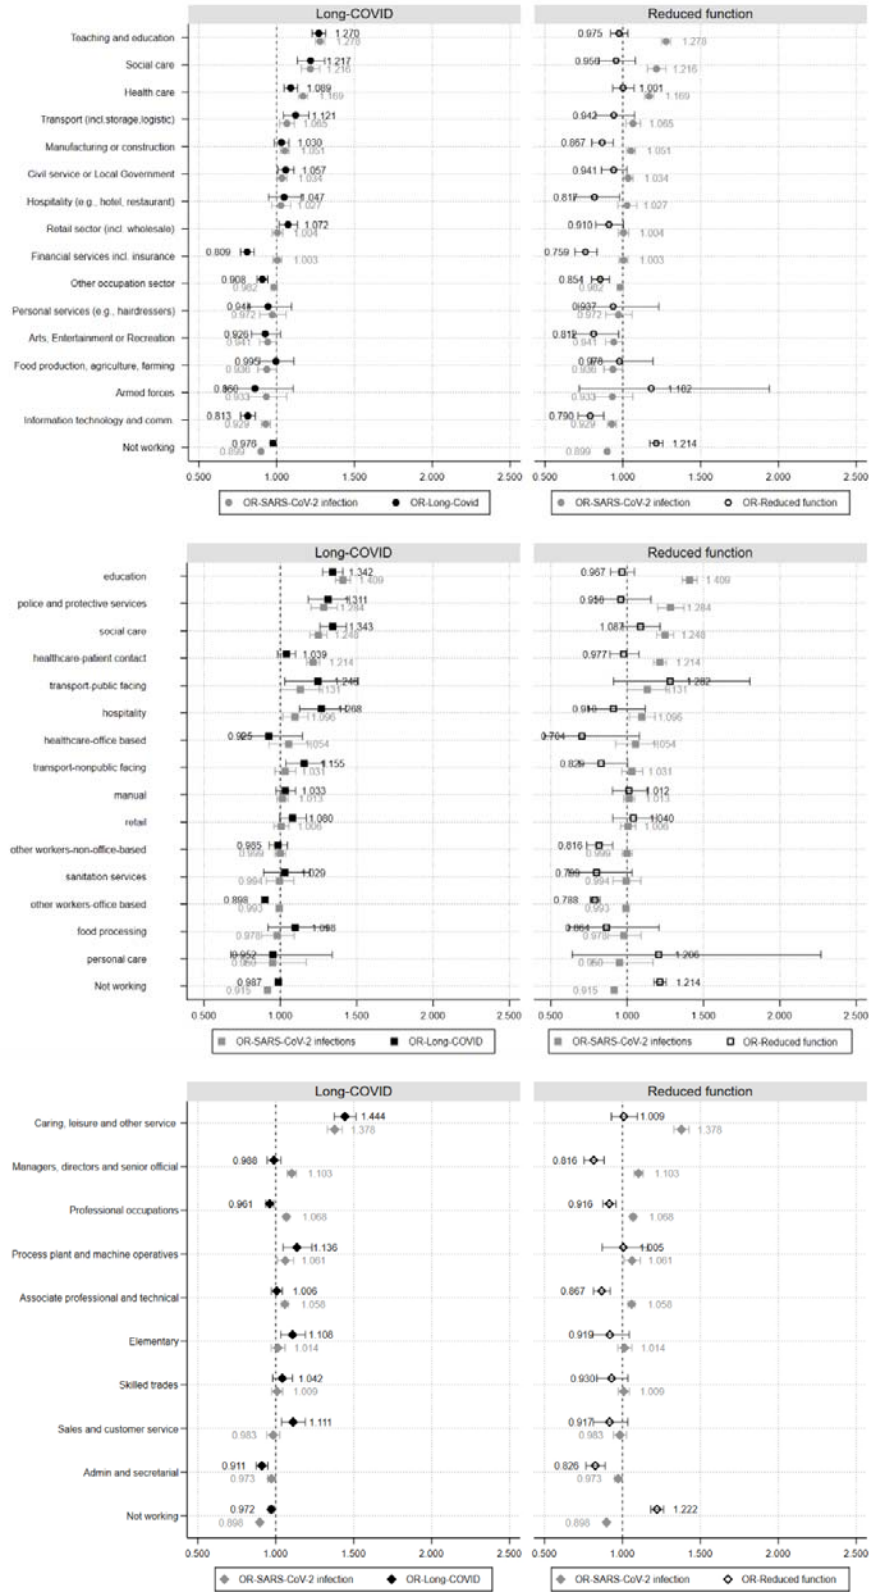

355

356 **Figure 3.** Odds (a-c) of having Long-COVID symptoms (left) and reduced function (right) by industry,  
 357 occupational groupings and major SOC groups

358

359 **Odds ratios (ORs) and prevalence (margins) of reduced function due to long-COVID**

360 In order to examine the extent to which long-COVID symptoms impacted daily activities (i.e., proxy  
361 of severity) we used a reduced sample for all three exposure groups as analyses were restricted to  
362 those self-reporting at least one long-COVID symptom over the study period. Final analytical samples  
363 were 30 543 participants for industry, 25 888 participants for occupational groups and 28 979  
364 participants for major SOC groups (Figure 1).

365 In the unadjusted model (Table S8) all industries, apart from healthcare (ORs 1.07; CIs: 1.00-1.14)  
366 and Social Care (1.07; CIs: 0.95-1.14), demonstrated lower odds of experiencing reduced function  
367 (i.e., reporting that daily activities were impacted a little or a lot) compared to the grand mean, while  
368 those not working had the highest odds (1.26; CIs: 1.23-2.03). Adjusting for all covariates attenuates  
369 ORs and in many cases confidence intervals are wide (e.g., Retail sector, food production and  
370 personal services); however, the trends remain stable (Table S8, Figure 3a).

371 Analysis by occupational groups (Table S8), similarly demonstrated that those not working have very  
372 high odds of reduced function (OR 1.25; CIs: 1.21-1.29); however, the highest odds are observed in  
373 the transport-public facing occupational group (1.29; CIs: 0.92-1.81), followed by personal (1.25; CIs:  
374 0.67-2.32) and social care (1.23; CIs: 1.10-1.37) occupations. In all other groups ORs are less than  
375 one. Adjusting for all confounders generally attenuated the odds, but results retained the same  
376 patterns for magnitude and confidence intervals (Table S8, Figure 3a).

377 By major SOC group, in the unadjusted model (Table S8) for almost all groups it is less likely for  
378 someone to demonstrate reduced function due to long-COVID. The exceptions were the not working  
379 group (OR 1.27; CIs: 1.23-1.31) and the caring, leisure and other services (1.09; CIs: 1.01-1.18).  
380 Following adjustment, effect is attenuated for all groups (Table S8, Figure 3a).

381 Prevalence of reduced function by a 'a little' ranged between 47% and 49% for all three exposure  
382 groups (Table S9, Figure S2). Prevalence of reduced function by 'a lot', ranged from 17.1% to 21.7%  
383 by industry (for the arts, entertainment or recreation and teaching and education sectors,  
384 respectively), and 27.3% for those not working. By occupational group, the lowest prevalence of  
385 reduced function by 'a lot' was observed for education (24.1%) and the highest for social care,  
386 personal care, and public-facing transport occupations. The latter were comparable to the  
387 prevalence for those not working (28.2%) (Table S9, Figure S2). By major SOC group, reduced  
388 function by 'a lot' ranged from 20.9% for managers, directors and senior officials and admin and  
389 secretarial to 24.4% for caring, leisure and other services and process plant and machine operatives.

390

391 **Sensitivity Panel Analysis - Relative risk (ORs) of long-COVID & reduced function due to long-**  
392 **COVID**

393 Analysis run on the specified two additional samples, i.e. (i) confirmed PCR test or (ii) confirmed PCR  
394 test or prior report of infection (Figures S3-S4) did not show different patterns, confirming the  
395 robustness of our results.

396 For long-COVID odds ratios from the panel analysis were relatively larger compared to our main  
397 analysis for almost all industrial and occupational groups. The opposite was observed for major SOC  
398 groups, although the magnitude of the odds ratios were closer to those in our main sample. Similar  
399 patterns were observed for the outcome of reduced daily function (Tables S10-S12), suggesting  
400 assumptions about changes in occupation/occupational status over time are valid.

401

402

403 **Discussion**

404 *Summary of findings*

405 The prevalence of self-reported long-COVID increased through the study period. The social care and  
406 education industry (~6%) and hospitality (~4%) occupations recorded the highest prevalence.  
407 Industries and occupations with high levels of office-based working (e.g., IT), displayed lowest odds  
408 of long-COVID compared to more public facing industries, including teaching and education, social  
409 care, healthcare, civil service, retail and transport industries and occupations. By major SOC group,  
410 those in caring, leisure and other services (OR 1.44; CIs: 1.38-1.52) and education displayed (1.34;  
411 CIs: 1.28-1.41) substantially higher odds than average. The likelihood of reporting long-COVID  
412 symptoms followed the trend of risk of infection for most industries, occupational groups and SOC  
413 groups. The exception was for professional occupations, where relative risk of reporting long-COVID  
414 symptoms was higher than that of infections. Indication of differing patterns between infection and  
415 long-COVID were also observed in other occupational groups, but results uncertainty was high. Long-  
416 COVID symptoms impacted almost half of all affected participants' ability to do daily activities by 'a  
417 little'. Participants in healthcare and social care industries were most impacted by 'a lot'. Similarly,  
418 occupational groups most affected were public-facing occupations with those working in transport  
419 occupations having the highest prevalence of all (30%), followed by the not working (28.1%) and

420 personal care (27.4%). For SOC groups the highest prevalence (24%) was observed in caring, leisure  
421 and other services and process plant and machine operatives.

#### 422 *Findings in context with previous literature*

423 To our knowledge, no other studies examine long-COVID across industries and/or occupational  
424 groups for direct comparisons. However, previous work estimated that ~10% of people infected with  
425 Covid-19 may have significant post-acute or chronic symptoms persisting >12 weeks (23) and that a  
426 substantial proportion of these will have symptoms that are disabling and involve prolonged absence  
427 from work (24). These findings are in line with our results (23 24). A study in adult patients with  
428 COVID-19 attending a hospital showed that post-acute COVID-19 syndrome was detected in a half of  
429 COVID-19 survivors (25). These are higher than our results but were an older cohort and probably  
430 represent a group with severe COVID-19 infection (25). Vulnerable groups are disproportionately  
431 represented among essential workers (e.g., bus drivers, allied health professionals) (26 27). In  
432 addition to being at a greater risk of infection (3 4 28), they may also face a disproportionate burden  
433 of long-COVID. Our findings suggest that workers in social care, education, hospitality, food  
434 production and transport have increased odds of long-COVID. Moreover, groups likely to have high  
435 levels of long-COVID include those with a high risk of SARS-CoV2 infection (26), with the exception of  
436 professional occupations.

437

#### 438 *Strengths & Limitations*

439 Our study has several strengths. We used a large nationally representative dataset to examine  
440 prevalence and risk of long-COVID across industries, and occupations, which fills an important gap in  
441 the literature. Our analysis included a relatively long study period (Feb2021-Apr2022), allowing us to  
442 examine trends of over time. Some limitations should be noted. Any analysis by occupation/sector  
443 requires aggregation of different types of workers in groups. It is possible that analyses mask  
444 differences within particular sectors or occupations. In our main analyses we utilised occupational  
445 status at the beginning of the study period, which may mask effects due to changes in employment  
446 status. However, our sensitivity analysis using a panel dataset addressed this. At the time of data  
447 collection, there was no universal definition of long-COVID, and the results reported rely on self-  
448 reported measures which are prone to bias. It is possible that bias in this measure is related to  
449 occupation – for example healthcare workers increased health knowledge may mean that they self-  
450 diagnose long-COVID differently. The CIS recording of COVID-19 infections does not include  
451 infections occurring between visits and missed visits may be related to occupation e.g., shift-

452 workers being unavailable at the CIS visit. It is not possible to assess the reason(s) participant are not  
453 working. Therefore, we cannot examine or exclude the possibility that some participants are not  
454 working due to long-COVID symptoms.

#### 455 *Conclusions*

456 The SARS-CoV-2 pandemic created new challenges for workers, employers, occupational and public  
457 health. Long-COVID is compounding to these challenges, mainly related to sustaining employment  
458 and return-to-work for those affected. Our findings show that long-COVID differences are evident  
459 across industries and occupations. Professional occupations, including jobs in teaching and  
460 education, IT, welfare and healthcare showed that the risk of infection may not be the only driving  
461 force. Our findings of increased risk of long-COVID in the health and social care industries support  
462 the findings that some health conditions are prescribed as industrial diseases (7) and highlight other  
463 sectors and occupations that require further attention. Scientific evidence is essential to understand  
464 the mechanisms resulting in long-COVID, how occupation influences prevalence and severity and  
465 whether working conditions affect the risk of developing long-COVID or interact with long-COVID to  
466 increase the impact on activities.

467

468

469

470

#### 471 **Contributors**

472 SR is the principal investigator. All authors contributed to the design of the proposal and study. TK  
473 lead and conducted the statistical analysis and was supported by ED and SR. TK and ED drafted the  
474 manuscript. All authors contributed to the interpretation of the results, critically revised the paper  
475 and agreed on the final version for submission.

476

#### 477 **Funding**

478 Funding from the ONS (ONS Ref PU-22-0205). MG, NP, MvT, JW, SR acknowledge funding through  
479 the National Core Study 'PROTECT' programme, managed by the Health and Safety Executive on  
480 behalf of HM Government. TK, ED and SVK acknowledge funding from the Medical Research Council  
481 (MRC; MC\_UU\_00022/2) and the Chief Scientist Office (CSO; SPHSU17). SVK also acknowledges



482 funding from a NRS Senior Clinical Fellowship (SCAF/15/02) and the National Core Study  
483 'Longitudinal Health and Wellbeing' programme (MC\_PC\_20030).

484

#### 485 **Disclaimer**

486 This work contains statistical data from ONS which is Crown Copyright. The use of the ONS statistical  
487 data in this work does not imply the endorsement of the ONS in relation to the interpretation or  
488 analysis of the statistical data. This work uses research datasets which may not exactly reproduce  
489 National Statistics aggregates.

490

#### 491 **Competing interests**

492 SVK was co-chair of the Scottish Government's Expert Reference Group on Ethnicity and COVID-19  
493 and a member of the UK Scientific Advisory Group on Emergencies subgroup on ethnicity.

494

#### 495 **Ethics approval**

496 The COVID-19 Infection Survey received ethical approval from the South-Central Berkshire B  
497 Research Ethics Committee (20/SC/0195). All participants provided informed consent. For use of this  
498 data for this project statistics authority self-assessment classified the study as low risk. This  
499 assessment was approved by the Office for National Statistics (ONS) Research Accreditation Panel.

500

#### 501 **Data availability statement**

502 ONS CIS data can be accessed only by researchers who are Office of National Statistics (ONS)  
503 accredited researchers. Researchers can apply for accreditation through the Research Accreditation  
504 Service. Access is through the Secure Research Service (SRS) and approved on a project basis. For  
505 further details see:

506 [https://www.ons.gov.uk/aboutus/whatwedo/statistics/requestingstatistics/approvedresearchersche](https://www.ons.gov.uk/aboutus/whatwedo/statistics/requestingstatistics/approvedresearcherscheme)  
507 [me](https://www.ons.gov.uk/aboutus/whatwedo/statistics/requestingstatistics/approvedresearcherscheme).

508

509 **Patient and public involvement:** Participants were not involved in the design and implementation of  
510 the study or in setting research questions and the outcome measures. No participants were asked to  
511 advise on interpretation or writing up of results.

512

513

## 514 **References**

- 515 1 Matz M, Allemani C, van Tongeren M et al. Excess mortality among essential workers in  
516 England and Wales during the COVID-19 pandemic. *J Epidemiol Community Health*  
517 2022;76:660-666.
- 518 2 Rhodes S, Wilkinson J, Pearce N et al. Occupational differences in SARS-CoV-2 infection:  
519 Analysis of the UK ONS Coronavirus (COVID-19) Infection Survey. *J Epidemiol Community*  
520 *Health* 2022;76:841.
- 521 3 Nafilyan V, Pawelek P, Ayoubkhani D et al. Occupation and COVID-19 mortality in England: a  
522 national linked data study of 14.3 million adults. *Occup Environ Med* 2022;79:433-441.
- 523 4 Mutambudzi M, Niedwiedz C, Macdonald EB et al. Occupation and risk of severe COVID-19:  
524 prospective cohort study of 120 075 UK Biobank participants. *Occup Environ Med*  
525 2020;78:307-14.
- 526 5 Beale S, Patel P, Rodger A et al. Occupation, work-related contact and SARS-CoV-2 anti-  
527 nucleocapsid serological status: findings from the Virus Watch prospective cohort study.  
528 *Occup Environ Med* 2022;79:729-35.
- 529 6 NICE. COVID-19 rapid guideline: managing the long-term effects of COVID-19 (v1.20).  
530 Available from: <https://www.nice.org.uk/guidance/ng188>. 2022.
- 531 7 IAC IAC. Independent report. COVID-19 and occupation: position paper 48. Published 25  
532 March 2021. Available from: [https://www.gov.uk/government/publications/covid-19-and-](https://www.gov.uk/government/publications/covid-19-and-occupation-iac-position-paper-48)  
533 [occupation-iac-position-paper-48](https://www.gov.uk/government/publications/covid-19-and-occupation-iac-position-paper-48). 2022.
- 534 8 Ayoubkhani D, Pawelek P. Statistical Bulletin. In: Statistics ON (ed.): ONS 2022.
- 535 9 Paul KI, Moser K. Unemployment impairs mental health: Meta-analyses. *Journal of*  
536 *Vocational Behavior* 2009;74:264-282.
- 537 10 Picchio M, Ubaldi M. Unemployment And Health: A Meta-Analysis. Working Papers 467,  
538 Universita' Politecnica delle Marche (I), Dipartimento di Scienze Economiche e Sociali. .  
539 Available from: <https://ideas.repec.org/p/anc/wpaper/467.html> 2022.
- 540 11 Roelfs DJ, Shor E, Davidson KW, Schwartz JE. Losing life and livelihood: a systematic review  
541 and meta-analysis of unemployment and all-cause mortality. *Soc Sci Med* 2011;72:840-54.
- 542 12 Waddell G, Burton AK. *Concepts of rehabilitation for the management of common health*  
543 *problems*. Available from: [https://www.gov.uk/government/publications/concepts-of-](https://www.gov.uk/government/publications/concepts-of-rehabilitation-management-of-common-health-problems)  
544 [rehabilitation-management-of-common-health-problems](https://www.gov.uk/government/publications/concepts-of-rehabilitation-management-of-common-health-problems), 2004.
- 545 13 Larsson A, Larsson SE. The effects of ethylene-1-hydroxy-1, 1-diphosphonate on cellular  
546 transformation and organic matrix of the epiphyseal growth plate of the rat--a light  
547 microscopic and ultrastructural study. *Acta Pathol Microbiol Scand A* 1978;86:211-23.
- 548 14 Van Wambeke E, Bezler C, Kasprovicz A-M, Charles A-L, Andres E, Geny B. Two-Years Follow-  
549 Up of Symptoms and Return to Work in Complex Post-COVID-19 Patients *Journal of Clinical*  
550 *Medicine* 2023.
- 551 15 Jacobsen PA, Andersen MP, Gislason G et al. Return to work after COVID-19 infection - A  
552 Danish nationwide registry study. *Public Health* 2022;203:116-122.

553 16 Westerlind E, Palstam A, Sunnerhagen KS, Persson HC. Patterns and predictors of sick leave  
554 after Covid-19 and long Covid in a national Swedish cohort. *BMC Public Health*  
555 2021;21:1023.

556 17 Rayner C, Campbell R. Long Covid Implications for the workplace. *Occup Med (Lond)*  
557 2021;71:121-123.

558 18 ONS. COVID-19 Infection Survey-Upcoming changes. Available from:  
559 <https://www.ons.gov.uk/surveys/informationforhouseholdsandindividuals/householdandin>  
560 [dividualsurveys/covid19infectionsurvey/upcomingchanges](https://www.ons.gov.uk/surveys/informationforhouseholdsandindividuals/householdandin). In: Statistics OfN (ed.) 2022.

561 19 -. UK Standard Industrial Classification of Economic Activities 2007 (SIC 2007). Available  
562 from:  
563 <https://www.ons.gov.uk/methodology/classificationsandstandards/ukstandardindustrialclas>  
564 [sificationofeconomicactivities/uksic2007](https://www.ons.gov.uk/methodology/classificationsandstandards/ukstandardindustrialclas), Newport, South Wales 2016.

565 20 -. Standard Occupational Classification (SOC). Available from:  
566 <https://www.ons.gov.uk/methodology/classificationsandstandards/standardoccupationalcla>  
567 [ssificationsoc](https://www.ons.gov.uk/methodology/classificationsandstandards/standardoccupationalcla) 2016.

568 21 Oude Hengel KM, Burdorf A, Pronk A et al. Exposure to a SARS-CoV-2 infection at work:  
569 development of an international job exposure matrix (COVID-19-JEM). *Scand J Work Environ*  
570 *Health* 2022;48:61-70.

571 22 StataCorp. *Stata Statistical Software: Release 17*. College Station, TX: StataCorp LLC., 2021.

572 23 Agius RM, MacDermott N. Covid-19 and workers' protection: lessons to learn, and lessons  
573 overlooked. *Occup Med (Lond)* 2022;72:62-64.

574 24 Gorna R, MacDermott N, Rayner C et al. Long COVID guidelines need to reflect lived  
575 experience. *Lancet* 2021;397:455-457.

576 25 Moreno-Perez O, Merino E, Leon-Ramirez JM et al. Post-acute COVID-19 syndrome.  
577 Incidence and risk factors: A Mediterranean cohort study. *J Infect* 2021;82:378-383.

578 26 Berger Z, Altiery DEJV, Assoumou SA, Greenhalgh T. Long COVID and Health Inequities: The  
579 Role of Primary Care. *Milbank Q* 2021;99:519-541.

580 27 Dorn AV, Cooney RE, Sabin ML. COVID-19 exacerbating inequalities in the US. *Lancet*  
581 2020;395:1243-1244.

582 28 Katikireddi SV, Hainey KJ, Beale S. The impact of COVID-19 on different population  
583 subgroups: ethnic, gender and age-related disadvantage. *J R Coll Physicians Edinb*  
584 2021;51:S40-S46.

585
